# Supplementary material for: Extracellular matrix stiffness cues junctional remodeling for 3D tissue elongation
Source: PubMed Central journal article supplement (PMC6659696; doi:10.1038/s41467-019-10874-x), 2019-07-26
Supplement: 41467_2019_10874_MOESM1_ESM.pdf [file 41467_2019_10874_MOESM1_ESM.pdf]

## **Supplementary Information**

**3D Tissue elongation via ECM stiffness-cued junctional remodeling**

**Chen et. al.**

# Supplementary Figure 1

**a** *control<sup>RNAi</sup>; indy-GFP*

DNA membrane GFP F-actin

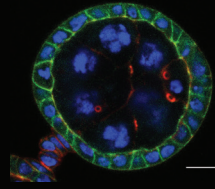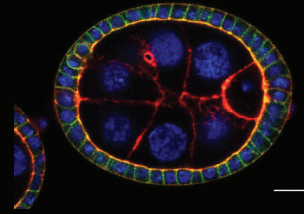

stage

**4**

**5**

number of cells

184 ± 34 s.d.

413 ± 50 s.d.

aspect ratio

1.17 ± 0.06 s.d.

1.34 ± 0.06 s.d.

volume (μm<sup>3</sup>)

64,252 ± 1,3183 s.d.

107,630 ± 2,1727 s.d.

nurse cell nuclear diameter (μm)

N/A (polytene)

12.95 ± 1.22 s.d.

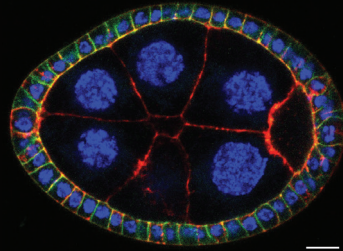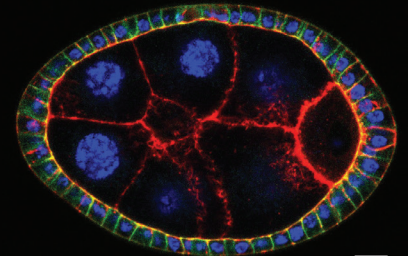

stage

**6A**

**6B**

number of cells

550 ± 44 s.d.

751 ± 66 s.d.

aspect ratio

1.42 ± 0.12 s.d.

1.54 ± 0.12 s.d.

volume (μm<sup>3</sup>)

131,636 ± 32,104 s.d.

219,000 ± 8,0991 s.d.

nurse cell nuclear diameter (μm)

14.28 ± 1.95 s.d.

15.59 ± 2.61 s.d.

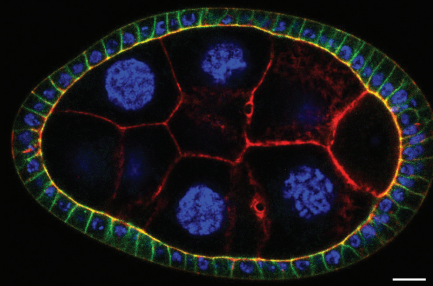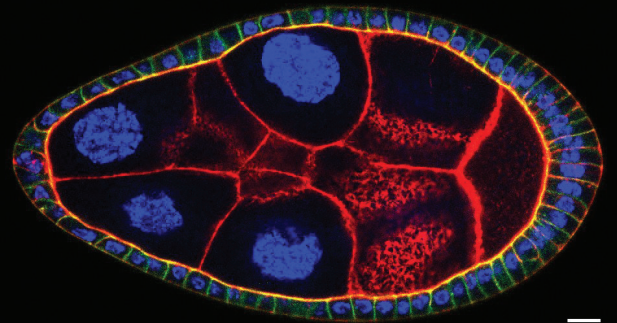

stage

**7**

**8**

number of cells

887 ± 33 s.d.

862 ± 28 s.d.

aspect ratio

1.82 ± 0.09 s.d.

1.91 ± 0.07 s.d.

volume (μm<sup>3</sup>)

334062 ± 49880 s.d.

552705 ± 91295 s.d.

nurse cell nuclear diameter (μm)

19.86 ± 3.05 s.d.

23.64 ± 1.66 s.d.

10 μm

**b**

| Stage | Duration by Lin&Spradling (h) | Duration by David&Merle (h) | Approx. range of follicle cell number | Approx. range of nurse cell nucleus diameter (μm) |
|-------|-------------------------------|-----------------------------|---------------------------------------|---------------------------------------------------|
| 4     | 6                             | 9.16                        | 125-350                               | N/A (polytene)                                    |
| 5     | 5                             | 2.61                        | 350-500                               | 11-14                                             |
| 6A    | 3                             | 8.45                        | 500-650                               | 14-15                                             |
| 6B    |                               |                             | 650-850                               | 15-17                                             |
| 7     | 6                             | 8.69                        | 850+                                  | 17-21                                             |
| 8     | 6                             | 5.21                        | 850+                                  | 21+                                               |

**Supplementary Figure 1| Representative wildtype egg chamber images and morphometrics.**

**a**, Morphometric data for follicles staged by cell number, which generally correlate with classic morphological criteria. Values shown are average  $\pm$  standard deviation (s.d.)

**b**, Table showing durations of stages according to Lin and Spradling (1993) deduced from single ovariole transplants into *ovoD1* female hosts, or David and Merle (1968) deduced from representation of follicle stages in wildtype hosts; Approximate range of follicle cell number and nurse cell nucleus diameter for suggested staging. scale bars, 10  $\mu$ m.

## Supplementary Figure 2

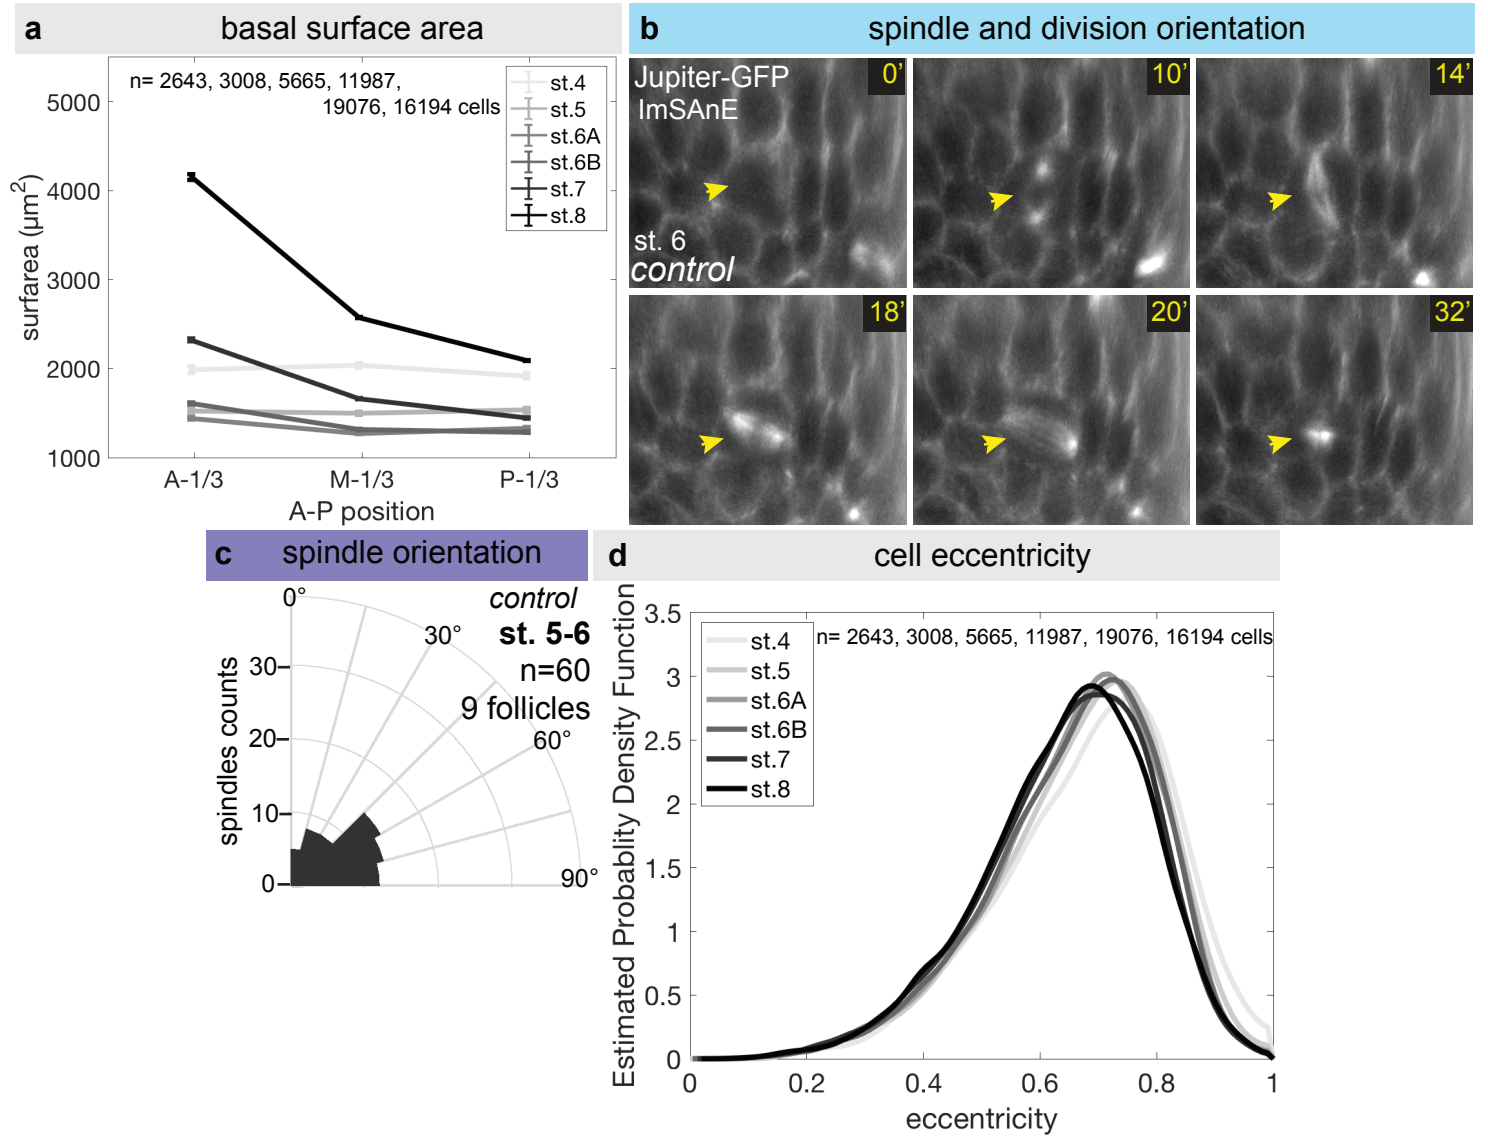

**Supplementary Figure 2| Additional morphometrics and mitotic spindle orientation.**

**a**, Mean basal surface area in wild type from stage 4-8 along the A-P meridian. (A-1/3: anterior one third; M-1/3: middle one third; P-1/3: posterior one third). **b**, Example from ImSAnE cylinder projection showing mitotic spindle (yellow arrowhead) in control stage 6 follicle rotating from initial latitudinal orientation to final AP-oriented cell division (see also **Supplementary Movie 3**). **c**, Quantitation of mitotic spindle orientations in wild type stage 5-6 follicles ( $0^\circ$  = latitudinal;  $90^\circ$  = meridional). **d**, Distribution of cell eccentricities in wild type from stage 4-8. n, biologically independent samples. Error bars, s.e.m. Source data are provided as a Source Data file.

# Supplementary Figure 3

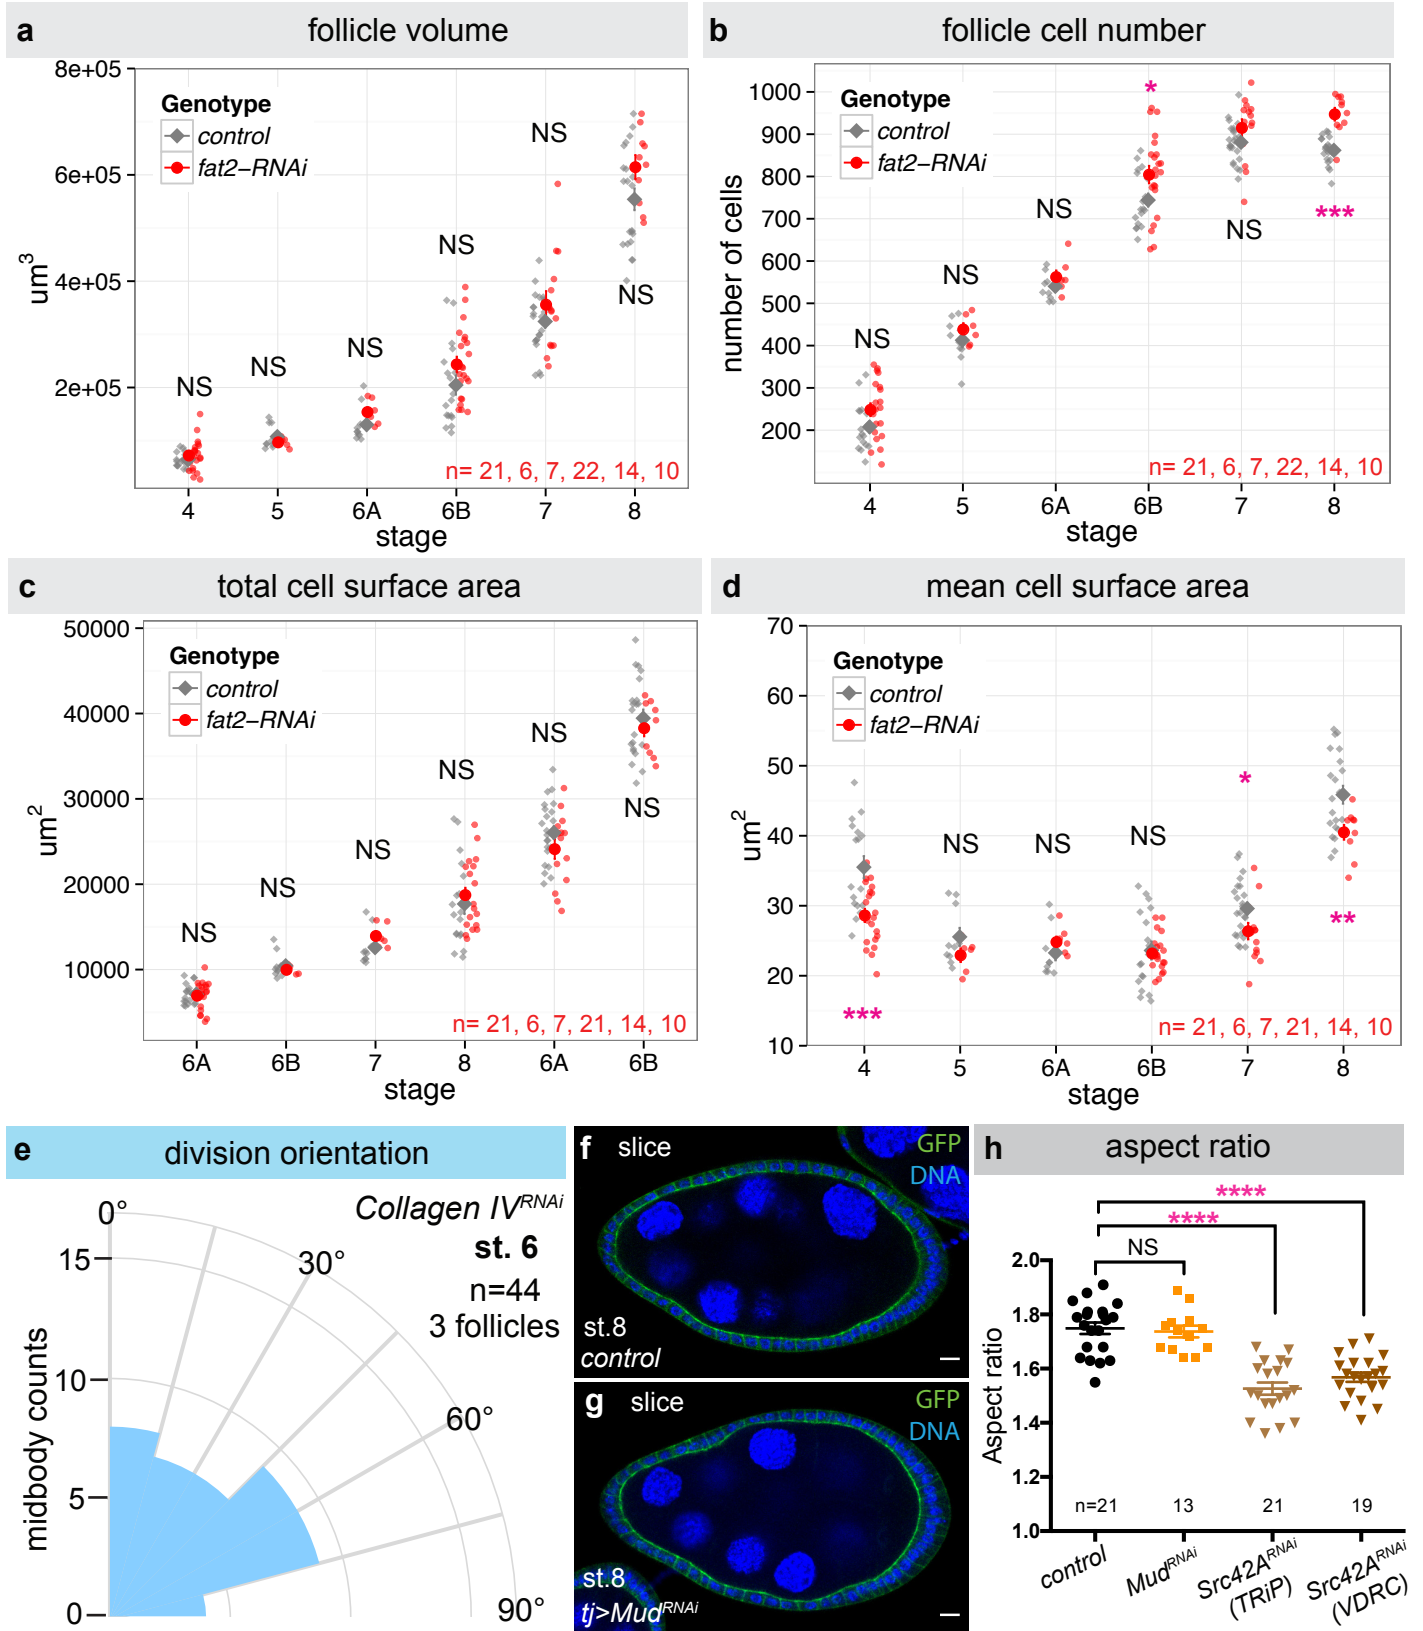

**Supplementary Figure 3| Additional morphometric analyses of *fat2*, *Collagen IV*, *Mud*, and *Src42A*-depleted follicles.**

**a-d**, Further morphometric data comparing control to *fat2*-depleted follicles with volume (**a**), P-values = 0.28, 0.19, 0.10, 0.27, 0.06; two-sided Welch's t-test, cell number (**b**), P-values = 0.05, 0.26, 0.25, 0.024, 0.15, 2.0e-04; two-sided Welch's t-test, total cell surface area (**c**), P-values = 0.73, 0.38, 0.11, 0.47, 0.17, 0.41; two-sided Welch's t-test, and mean cell surface area (**d**), P-values = 9.1e-04, 0.13, 0.26, 0.77, 0.03, 0.003; two-sided Welch's t-test. **e**, Cell divisions remain ~randomly oriented at stage 6 in *Collagen IV*-depleted follicles. **f-g**, *Mud*-depleted follicles are able to elongate. **h**, Quantitation of follicle elongation in *Mud*-depleted and *Src42A*-depleted follicles stage 8 follicles. P-values = 0.69, <0.0001, <0.0001; two-sided Welch's t-test. n, biologically independent samples. NS, not significant, \*P<0.5, \*\*P<0.01, \*\*\*P<0.001, \*\*\*\*P<0.0001. scale bars, 10  $\mu$ m. Error bars, s.e.m.

# Supplementary Figure 4

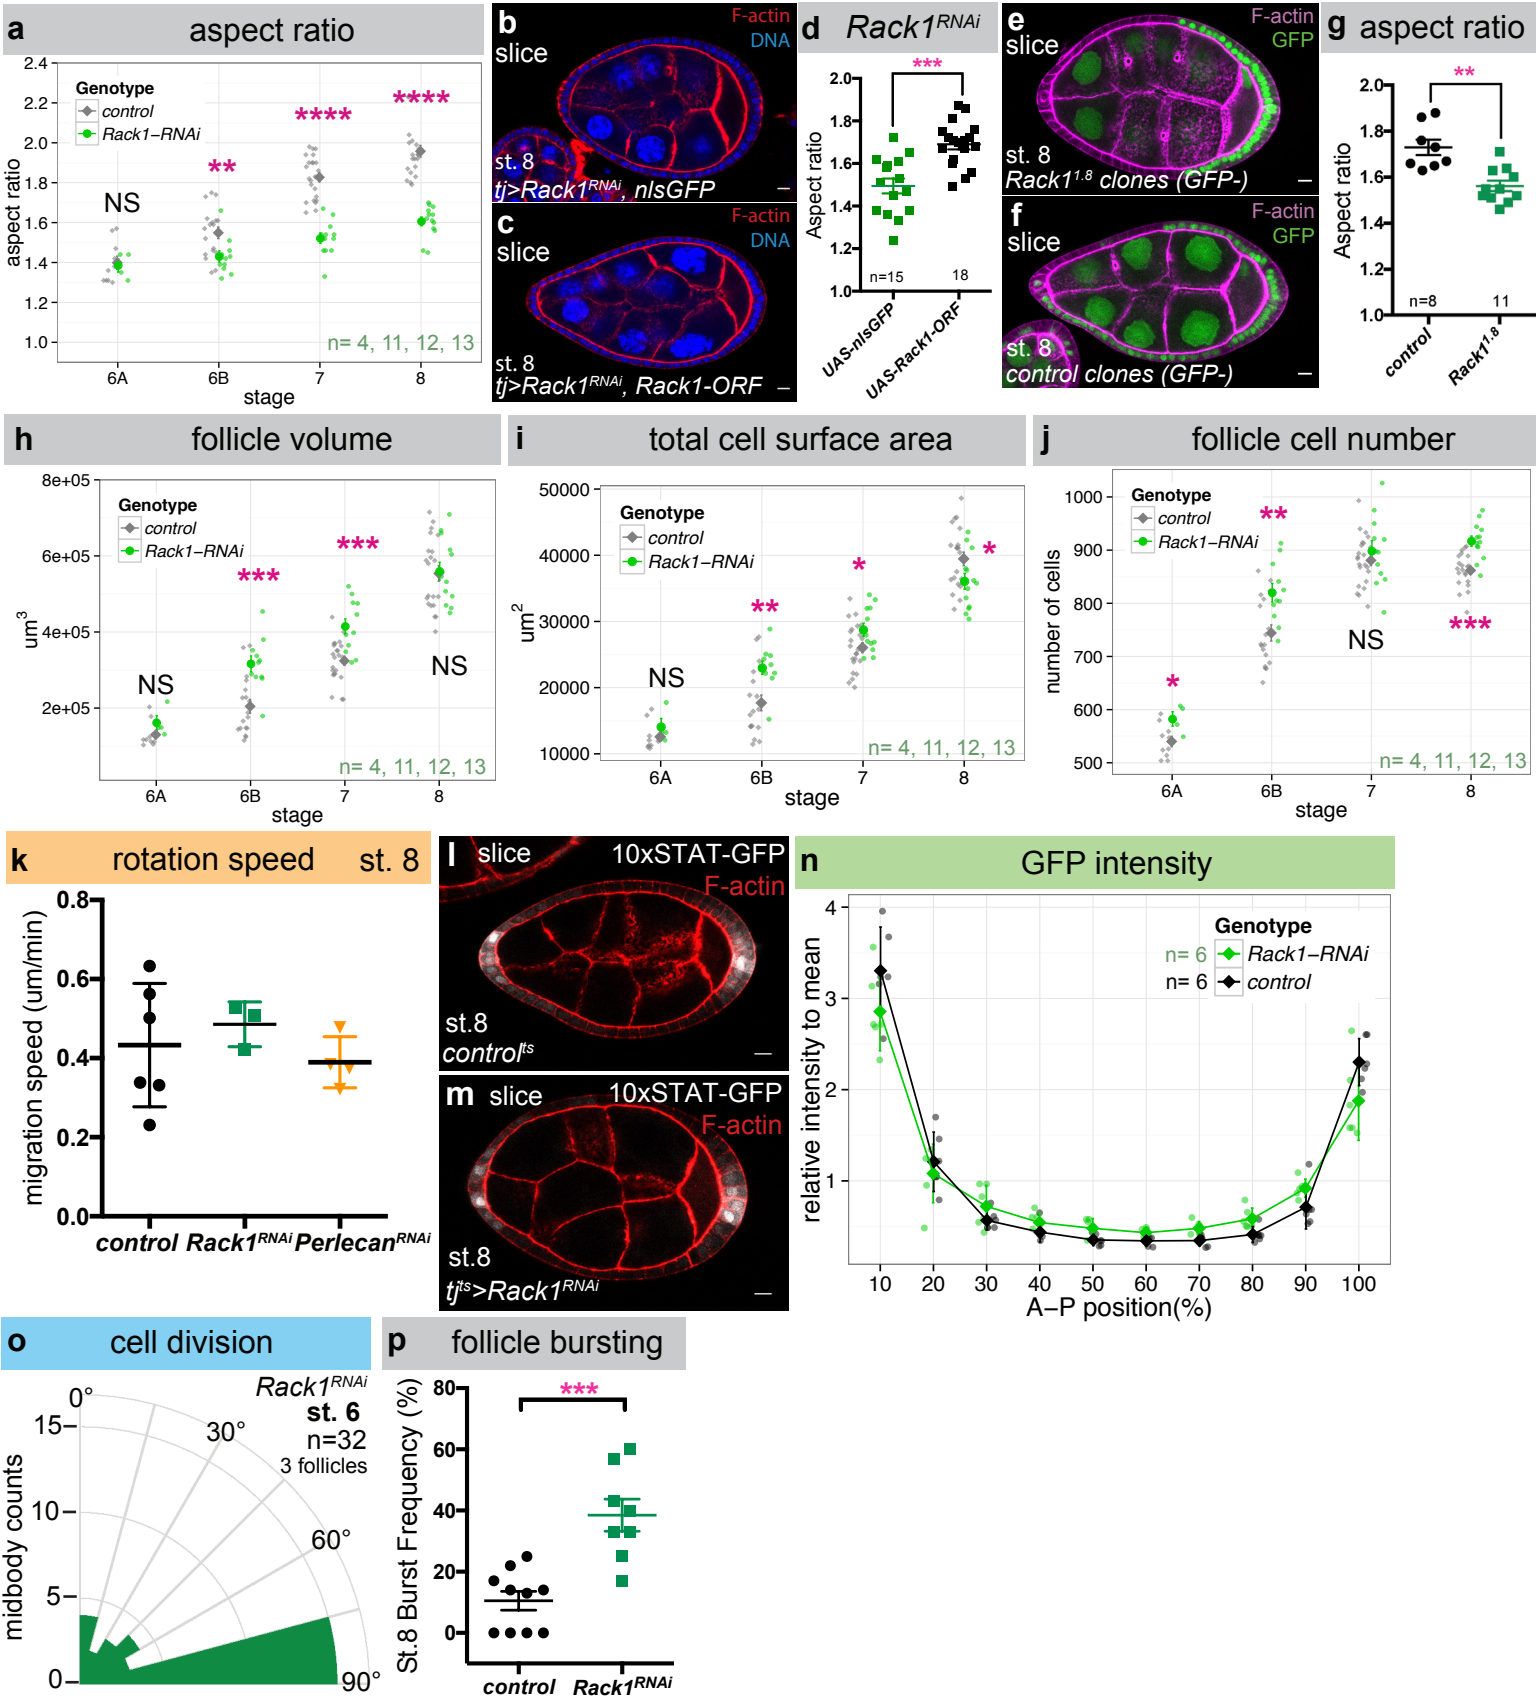



**Supplementary Figure 4| Morphometrics, follicle rotation speed, STAT activity, cell division orientation, and follicle bursting of *Rack1*-depleted follicle.**

**a**, Elongation of *Rack1*-depleted follicles diverges from control at stage 6B. **b-d**, *Rack1*-depleted round follicle phenotype is rescued by overexpression of the *Rack1*-ORF. P-value = 0.0001; two-sided Welch's t-test. **e-g**, Mitotic clones of a *Rack1* null allele (marked by absence of GFP) perturb elongation. P-value = 0.0013; two-sided Welch's t-test. **h-j**, Further morphometric data comparing control to *Rack1*-depleted follicles follicle with volume (**h**); P-values = 0.21, 5.2e-04, 8.5e-04, 0.86; two-sided Welch's t-test, total cell surface area (**i**); P-values = 0.34, 0.0019, 0.04, 0.04; two-sided Welch's t-test, and follicle cell number (**j**); P-values = 0.04, 0.003, 0.42, 0.0001; two-sided Welch's t-test. **k**, Both *Rack1* and *Perlecan*-depleted follicles undergo rotation (see also **Supplementary Movie 4**). **l-n**, *Rack1*-depleted follicles show normal STAT activity gradients (grey) at poles. **o**, *Rack1*-depleted follicles undergo oriented cell divisions at stage 6 (n=32) similar to control. **p**, Bursting frequency of *Rack1*-depleted follicles under osmotic stress is increased compared to control follicles. n, biologically independent samples. NS, not significant, \*P<0.5, \*\*P<0.01, \*\*\*P<0.001, \*\*\*\*P<0.0001. scale bars, 10  $\mu$ m. except for **n**, Error bars, s.e.m.

# Supplementary Figure 5

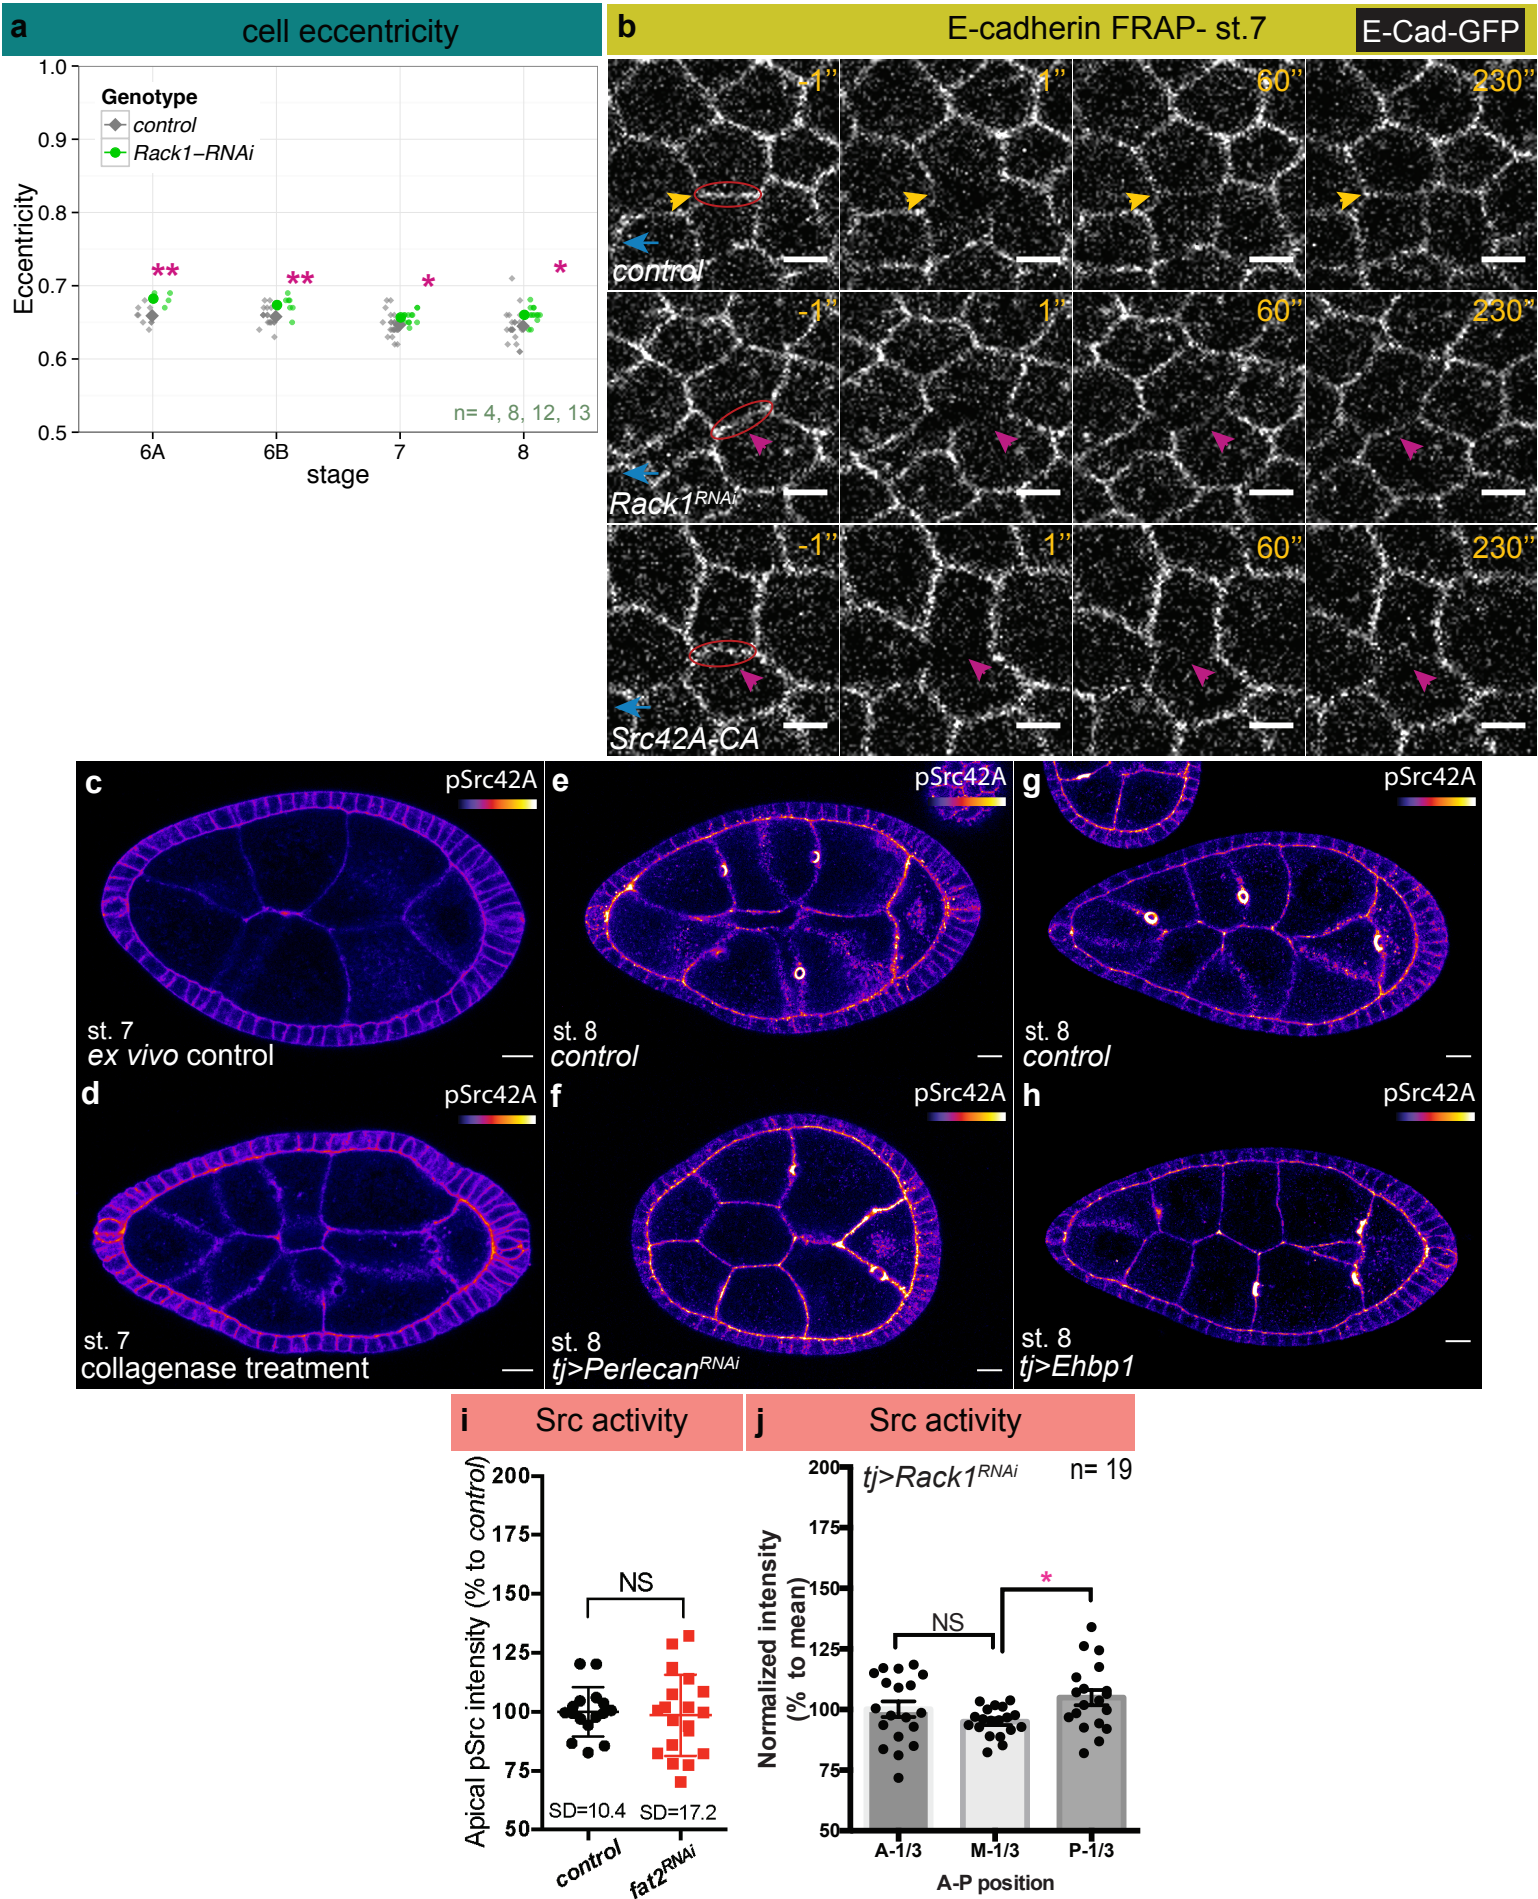

**Supplementary Figure 5| Additional morphometrics of *Rack1*-depleted follicles, representative FRAP images, and representative images for Src activity measurements.**

**a**, Cell eccentricity is slightly increased when *Rack1* is depleted. P-values = 0.0063, 0.0079, 0.017, and 0.013; two-sided Welch's t-test. **b**, FRAP recovery is not through lateral diffusion. Yellow and magenta arrows mark photobleached junctions; blue arrows indicate direction of follicle rotation. (See also **Supplementary Movie 5**). **c-h**, Representative images from pSrc measurements in Figure 7 on **c-d**, *ex-vivo* culture control and collagenase treatment, **e-f**, control and *Perlecan-RNAi*, **g-h**, control and *UAS-Ehbp1*. **i**, *fat2*-depleted follicles show higher variation of phosphorylated Src at apical junctions compared to wild type. Error bars, standard deviation (SD), n= 16 and 19, P-value s = 0.76; two-sided Welch's t-test. **j**, Quantification of pSrc intensity in stage 8 *Rack1* depleted follicles along the A-P meridian (A-1/3: anterior one-third; M-1/3: middle-one third; P-1/3: posterior one-third). pSrc intensities were normalized to mean pSrc levels of each follicle. Error bars, s.e.m. P-value s = 0.194 and 0.013; Two-sided paired sample t-test. n, biologically independent samples. Scale bars in **b**, 3  $\mu$ m. Scale bars in **c-h**, 10  $\mu$ m. NS, not significant, \*P<0.5, \*\*P<0.01.

# Supplementary Figure 6

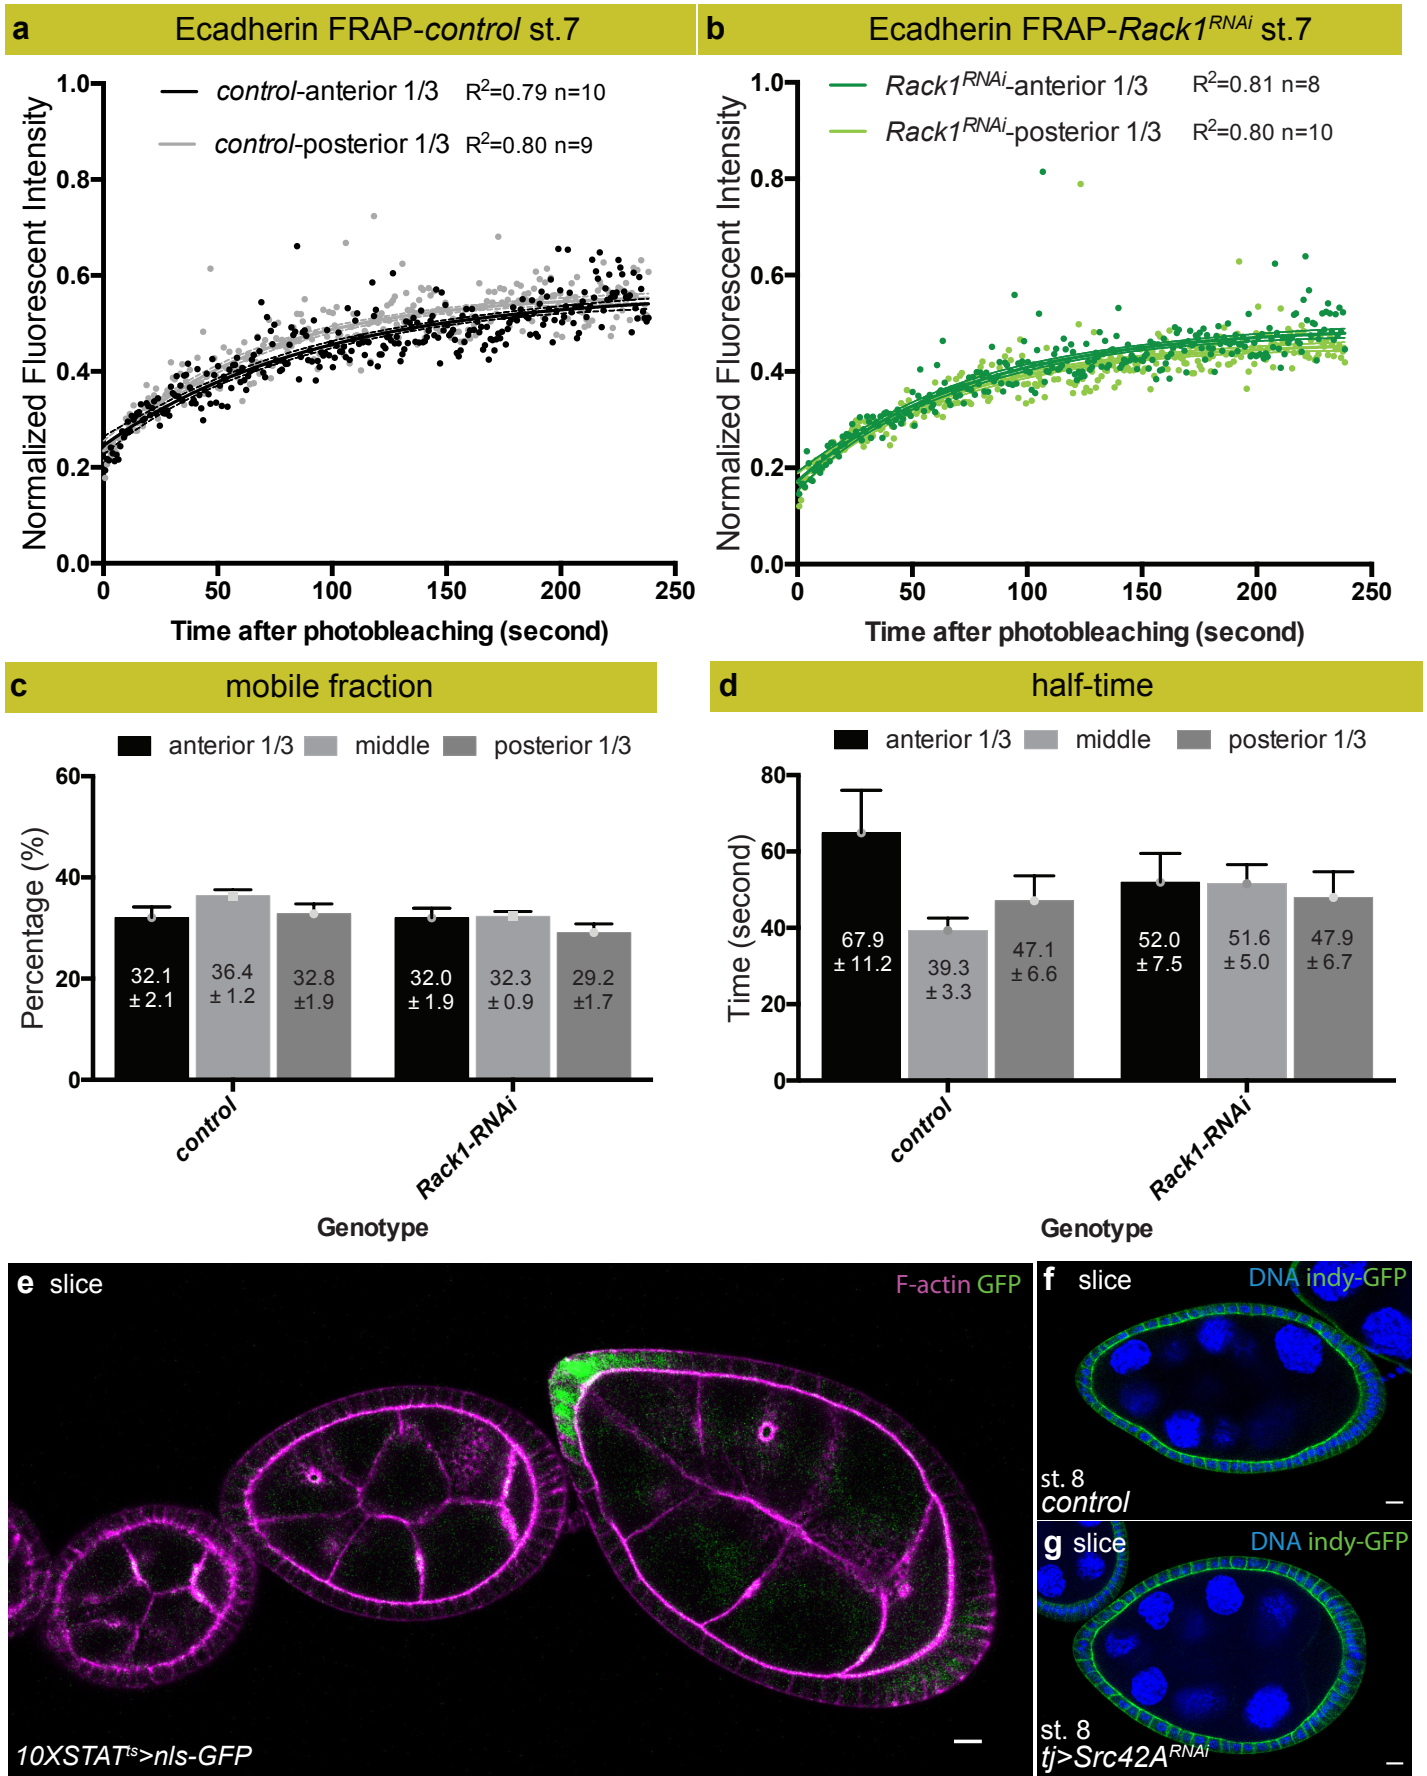

**Supplementary Figure 6| Positional FRAP analyses, 10XSTAT-GAL4 expression pattern, and Src42A-RNAi phenotype.**

**a-b**, FRAP analysis of Ecad-GFP in *control* and *Rack1*-depleted follicles at stage 7, performed at the anterior and posterior one-third. Dots represent mean of normalized intensity after photobleaching and lines are fitted curves with error bars showing 95% confidence intervals. **c**, Mobile fraction of Ecad-GFP is similar along the A-P meridian and in both genotypes. Error bars, 95% confidence intervals. **d**, Recovery half-time is increased at the anterior in *control* compared to the middle (equator); half-time at anterior, middle, and the posterior are similar when *Rack1* is depleted. Error bars show 95% confidence intervals. **e**, *10XSTAT-GAL4* drives transgene expression predominantly in follicle anterior at stage 7-8. **f-g**, *Src42A*-depleted follicles show impaired elongation. n, Sample size. Scale bars, 10  $\mu$ m. Source data are provided as a Source Data file.

**Supplementary Table 1: Detailed Drosophila genotypes**

| Figure Panel                                                       | Genotype                                                          |
|--------------------------------------------------------------------|-------------------------------------------------------------------|
| <b>1</b>                                                           | <b>a-g</b> <i>tj-GAL4/+; mcherry-RNAi/indy-GFP</i>                |
| <b>2</b>                                                           | <b>a-e</b> <i>tj-GAL4/+; mcherry-RNAi/indy-GFP</i>                |
| <b>3</b>                                                           | <b>b-d</b> <i>tj-GAL4/+; mcherry-RNAi/Jupiter-GFP</i>             |
|                                                                    | <b>f-i</b> <i>tj-GAL4/+; mcherry-RNAi/indy-GFP</i>                |
| <b>4</b>                                                           | <b>b-d</b> <i>tj-GAL4/+; mcherry-RNAi/indy-GFP</i>                |
|                                                                    | <b>f-i</b> <i>tj-GAL4/+; mcherry-RNAi/indy-GFP</i>                |
| <b>5</b>                                                           | <b>a</b> <i>tj-GAL4/+; mcherry-RNAi/indy-GFP</i>                  |
|                                                                    | <b>b</b> <i>tj-GAL4/fat2-RNAi; indy-GFP/+</i>                     |
|                                                                    | <b>c</b> <i>tj-GAL4/+; mcherry-RNAi/indy-GFP</i>                  |
|                                                                    | <b>c</b> <i>tj-GAL4/fat2-RNAi; indy-GFP/+</i>                     |
|                                                                    | <b>d</b> <i>tj-GAL4/fat2-RNAi; indy-GFP/+</i>                     |
|                                                                    | <b>e</b> <i>tj-GAL4, tubP-GAL80[ts]/+; mcherry-RNAi/+</i>         |
|                                                                    | <b>f</b> <i>tj-GAL4, tubP-GAL80[ts]/+; UAS-fzr/+</i>              |
|                                                                    | <b>f</b> <i>tj-GAL4, tubP-GAL80[ts]/+; mcherry-RNAi/+</i>         |
|                                                                    | <b>g-h</b> <i>tj-GAL4, tubP-GAL80[ts]/+; mcherry-RNAi/indyGFP</i> |
|                                                                    | <b>g-h</b> <i>tj-GAL4, tubP-GAL80[ts]/+; UAS-fzr/+</i>            |
|                                                                    | <b>g-h</b> <i>tj-GAL4, tubP-GAL80[ts]/+; UAS-fzr/indyGFP</i>      |
|                                                                    | <b>i-j</b> <i>tj-GAL4/+; mcherry-RNAi/indy-GFP</i>                |
|                                                                    | <b>i-j</b> <i>tj-GAL4/fat2-RNAi; indy-GFP/+</i>                   |
| <b>k-l</b> <i>tj-GAL4/fat2-RNAi; indy-GFP/+</i>                    |                                                                   |
| <b>m-o</b> <i>tj-GAL4/+; mcherry-RNAi/indy-GFP</i>                 |                                                                   |
| <b>m-o</b> <i>tj-GAL4/fat2-RNAi; indy-GFP/+</i>                    |                                                                   |
| <b>6</b>                                                           | <b>a</b> <i>tj-GAL4/+; mcherry-RNAi/indy-GFP</i>                  |
|                                                                    | <b>b</b> <i>tj-GAL4/+; Rack1-RNAi/indy-GFP</i>                    |
|                                                                    | <b>c</b> <i>tj-GAL4, E-cadGFP[ki]/+; mcherry-RNAi/+</i>           |
|                                                                    | <b>d</b> <i>tj-GAL4, E-cadGFP[ki]/+; Rack1-RNAi/+</i>             |
|                                                                    | <b>e</b> <i>tj-GAL4/+; mcherry-RNAi/indy-GFP</i>                  |
|                                                                    | <b>e</b> <i>tj-GAL4/+; Rack1-RNAi/indy-GFP</i>                    |
|                                                                    | <b>f</b> <i>tj-GAL4/+; mcherry-RNAi/indy-GFP</i>                  |
|                                                                    | <b>g</b> <i>tj-GAL4/+; Rack1-RNAi/indy-GFP</i>                    |
|                                                                    | <b>g</b> <i>tj-GAL4/+; mcherry-RNAi/indy-GFP</i>                  |
|                                                                    | <b>h</b> <i>tj-GAL4, E-cadGFP[ki]/+; mcherry-RNAi/+</i>           |
|                                                                    | <b>h</b> <i>tj-GAL4/+; Rack1-RNAi/indy-GFP</i>                    |
|                                                                    | <b>h</b> <i>tj-GAL4, E-cadGFP[ki]/+; Rack1-RNAi/+</i>             |
|                                                                    | <b>i</b> <i>tj-GAL4/+; mcherry-RNAi/indy-GFP</i>                  |
|                                                                    | <b>j</b> <i>tj-GAL4/+; Rack1-RNAi/indy-GFP</i>                    |
|                                                                    | <b>k</b> <i>tj-GAL4/+; mcherry-RNAi/indy-GFP</i>                  |
|                                                                    | <b>k</b> <i>tj-GAL4/+; Rack1-RNAi/indy-GFP</i>                    |
|                                                                    | <b>l</b> <i>tj-GAL4/+; mcherry-RNAi/indy-GFP</i>                  |
| <b>l</b> <i>tj-GAL4/+; UAS-Src42A-CA/indy-GFP</i>                  |                                                                   |
| <b>m</b> <i>w1118; tj-GAL4, tubP-GAL80[ts]/+; Rack1-RNAi/+</i>     |                                                                   |
| <b>m</b> <i>tj-GAL4, tubP-GAL80[ts]/Src42A[26-1]; Rack1-RNAi/+</i> |                                                                   |
| <b>n-o</b> <i>tj-GAL4/+; Rack1-RNAi/indy-GFP</i>                   |                                                                   |
| <b>p-s</b> <i>tj-GAL4/+; mcherry-RNAi/indy-GFP</i>                 |                                                                   |
| <b>p-s</b> <i>tj-GAL4/+; Rack1-RNAi/indy-GFP</i>                   |                                                                   |

|    |                                                                                                                                                                                                                                                                                                                                                                                                                                                                                                                                                                                                                                                                                                                                                                                                                                                                                                                                                                                                                                                                                                    |
|----|----------------------------------------------------------------------------------------------------------------------------------------------------------------------------------------------------------------------------------------------------------------------------------------------------------------------------------------------------------------------------------------------------------------------------------------------------------------------------------------------------------------------------------------------------------------------------------------------------------------------------------------------------------------------------------------------------------------------------------------------------------------------------------------------------------------------------------------------------------------------------------------------------------------------------------------------------------------------------------------------------------------------------------------------------------------------------------------------------|
| 7  | <p><b>a-c</b> <i>tj-GAL4, E-cadGFP[ki]/+; mcherry-RNAi/+</i><br/> <i>tj-GAL4, E-cadGFP[ki]/+; Rack1-RNAi/+</i><br/> <i>tj-GAL4, E-cadGFP[ki]/+; UAS-<i>Src42A-CA</i>/+</i><br/> <i>tj-GAL4, vkg-GFP/+; mcherry-RNAi/+</i><br/> <i>yw; tj-GAL4/+; Dr/+</i></p> <p><b>d</b> <i>yw; tj-GAL4/+; UAS-mcherry-Ehbp1/Dr</i><br/> <i>tj-GAL4/+; mcherry-RNAi/indy-GFP</i><br/> <i>tj-GAL4/+; Perlecan(trol)-RNAi/indy-GFP</i></p> <p><b>e-f</b> <i>tj-GAL4/+; mcherry-RNAi/indy-GFP</i><br/> <i>tj-GAL4/+; Perlecan(trol)-RNAi/indy-GFP</i><br/> <i>tj-GAL4/+; mcherry-RNAi/indy-GFP</i></p> <p><b>g</b> <i>tj-GAL4/fat2-RNAi; indy-GFP/+</i><br/> <i>tj-GAL4/+; Perlecan(trol)-RNAi/indy-GFP</i></p> <p><b>h-i</b> <i>tj-GAL4/+; mcherry-RNAi/indy-GFP</i></p> <p><b>j</b> <i>w; 10xSTAT-GAL4/+; UAS-nls-GFP/tubP-GAL80[ts]</i></p> <p><b>k</b> <i>w; 10xSTAT-GAL4/+; Rack1-RNAi/tubP-GAL80[ts]</i><br/> <i>w; 10xSTAT-GAL4/+; mcherry-RNAi/tubP-GAL80[ts]</i></p> <p><b>l</b> <i>w; 10xSTAT-GAL4/+; Rack1-RNAi/tubP-GAL80[ts]</i><br/> <i>w; 10xSTAT-GAL4/+; UAS-<i>Src42A-CA</i>/tubP-GAL80[ts]</i></p> |
| S1 | <p><b>a-b</b> <i>tj-GAL4/+; mcherry-RNAi/indy-GFP</i></p>                                                                                                                                                                                                                                                                                                                                                                                                                                                                                                                                                                                                                                                                                                                                                                                                                                                                                                                                                                                                                                          |
| S2 | <p><b>a</b> <i>tj-GAL4/+; mcherry-RNAi/indy-GFP</i></p> <p><b>b-c</b> <i>tj-GAL4/+; mcherry-RNAi/Jupiter-GFP</i></p> <p><b>d</b> <i>tj-GAL4/+; mcherry-RNAi/indy-GFP</i></p>                                                                                                                                                                                                                                                                                                                                                                                                                                                                                                                                                                                                                                                                                                                                                                                                                                                                                                                       |
| S3 | <p><b>a-d</b> <i>tj-GAL4/+; mcherry-RNAi/indy-GFP</i><br/> <i>tj-GAL4/fat2-RNAi; indy-GFP/+</i></p> <p><b>e</b> <i>tj-GAL4/vkg-RNAi; cg25c-RNAi/Jupiter-GFP</i></p> <p><b>f</b> <i>tj-GAL4/+; mcherry-RNAi/indy-GFP</i></p> <p><b>g</b> <i>tj-GAL4/+; Mud-RNAi/indy-GFP</i><br/> <i>tj-GAL4/+; mcherry-RNAi/indy-GFP</i></p> <p><b>h</b> <i>tj-GAL4/+; Mud-RNAi/indy-GFP</i><br/> <i>tj-GAL4/+; Src42A-RNAi(TRiP)/indy-GFP</i><br/> <i>tj-GAL4/Src42A-RNAi(VDRC-KK)/; indy-GFP/+</i></p>                                                                                                                                                                                                                                                                                                                                                                                                                                                                                                                                                                                                           |
|    | <p><b>a</b> <i>tj-GAL4/+; mcherry-RNAi/indy-GFP</i><br/> <i>tj-GAL4/+; Rack1-RNAi/indy-GFP</i></p> <p><b>b</b> <i>tj-GAL4, tubP-GAL80[ts]/+; Rack1-RNAi/UAS-nlsGFP</i></p> <p><b>c</b> <i>tj-GAL4, tubP-GAL80[ts]/+; Rack1-RNAi/UAS-Rack1-ORF-3xHA</i></p> <p><b>d</b> <i>tj-GAL4, tubP-GAL80[ts]/+; Rack1-RNAi/UAS-nlsGFP</i><br/> <i>tj-GAL4, tubP-GAL80[ts]/+; Rack1-RNAi/UAS-Rack1-ORF-3xHA</i></p>                                                                                                                                                                                                                                                                                                                                                                                                                                                                                                                                                                                                                                                                                            |

|           |                                                                                                                                                                                                                                                                                                                                                                                                                                                                                                                                                                                                                                                                                                                                                                                                                   |
|-----------|-------------------------------------------------------------------------------------------------------------------------------------------------------------------------------------------------------------------------------------------------------------------------------------------------------------------------------------------------------------------------------------------------------------------------------------------------------------------------------------------------------------------------------------------------------------------------------------------------------------------------------------------------------------------------------------------------------------------------------------------------------------------------------------------------------------------|
| <b>S4</b> | <p><b>e</b> ubi-eGFP-FRT40/Rack1[1.8]-FRT40A; GR1-GAL4, UAS-FLP/+</p> <p><b>f</b> ubi-eGFP-FRT40/FRT40A; GR1-GAL4, UAS-FLP/+</p> <p><b>g</b> ubi-eGFP-FRT40/Rack1[1.8]-FRT40A; GR1-GAL4, UAS-FLP/+</p> <p>ubi-eGFP-FRT40/FRT40A; GR1-GAL4, UAS-FLP/+</p> <p><b>h-j</b> <i>tj-GAL4/+; mcherry-RNAi/indy-GFP</i><br/> <i>tj-GAL4/+; Rack1-RNAi/indy-GFP</i><br/> <i>tj-GAL4/+; mcherry-RNAi/indy-GFP</i></p> <p><b>k</b> <i>tj-GAL4/+; Rack1-RNAi/indy-GFP</i><br/> <i>tj-GAL4/+; Perlecan(trol)-RNAi/indy-GFP</i></p> <p><b>l</b> <i>tj-GAL4, tubP-GAL80[ts]/+; 10XSTAT-GFP/mcherry-RNAi</i></p> <p><b>m</b> <i>tj-GAL4, tubP-GAL80[ts]/+; 10XSTAT-GFP/Rack1-RNAi</i></p> <p><b>n</b> <i>tj-GAL4, tubP-GAL80[ts]/+; 10XSTAT-GFP/mcherry-RNAi</i><br/> <i>tj-GAL4, tubP-GAL80[ts]/+; 10XSTAT-GFP/Rack1-RNAi</i></p> |
| <b>S5</b> | <p><b>a</b> <i>tj-GAL4/+; mcherry-RNAi/indy-GFP</i><br/> <i>tj-GAL4/+; Rack1-RNAi/indy-GFP</i><br/> <i>tj-GAL4, E-cadGFP[ki]/+; mcherry-RNAi/+</i></p> <p><b>b</b> <i>tj-GAL4, E-cadGFP[ki]/+; Rack1-RNAi/+</i><br/> <i>tj-GAL4, E-cadGFP[ki]/+; UAS-<i>Src42A-CA</i>/+</i></p> <p><b>c-d</b> <i>tj-GAL4, vkg-GFP/+; mcherry-RNAi/+</i></p> <p><b>e</b> <i>tj-GAL4/+; mcherry-RNAi/indy-GFP</i></p> <p><b>f</b> <i>tj-GAL4/+; Perlecan(trol)-RNAi/indy-GFP</i></p> <p><b>g</b> <i>yw; tj-GAL4/+; Dr/+</i></p> <p><b>h</b> <i>yw; tj-GAL4/+; UAS-mcherry-Ehbp1/Dr</i></p> <p><b>i</b> <i>tj-GAL4/+; mcherry-RNAi/indy-GFP</i><br/> <i>tj-GAL4/fat2-RNAi; indy-GFP/+</i></p> <p><b>j</b> <i>tj-GAL4/+; Rack1-RNAi/indy-GFP</i></p>                                                                                  |
| <b>S6</b> | <p><b>a-d</b> <i>tj-GAL4, E-cadGFP[ki]/+; mcherry-RNAi/+</i><br/> <i>tj-GAL4, E-cadGFP[ki]/+; Rack1-RNAi/+</i></p> <p><b>e</b> <i>w; 10xSTAT-GAL4/+; UAS-nls-GFP/tubP-GAL80[ts]</i></p> <p><b>f</b> <i>tj-GAL4/+; mcherry-RNAi/indy-GFP</i></p> <p><b>g</b> <i>tj-GAL4/+; Src42A-RNAi(TRiP)/indy-GFP</i></p>                                                                                                                                                                                                                                                                                                                                                                                                                                                                                                      |



**Supplementary Table 2 : Antibodies and reagents**

| <b>Antibody/Reagent</b>                                                               | <b>Dilution used</b> | <b>Provider</b>                                  | <b>Catalogue Number</b> |
|---------------------------------------------------------------------------------------|----------------------|--------------------------------------------------|-------------------------|
| Mouse monoclonal Anti-GFP (3E6)                                                       | 1:50                 | ThermoFisher                                     | A11120                  |
| Goat anti-Mouse IgG (H+L) Cross-Adsorbed Secondary Antibody, Alexa Fluor 488          | 1:300                | ThermoFisher                                     | A11001                  |
| Goat anti-Rabbit IgG (H+L) Cross-Adsorbed Secondary Antibody, Alexa Fluor 488         | 1:300                | ThermoFisher                                     | A11008                  |
| Goat anti-Rabbit IgG (H+L) Cross-Adsorbed Secondary Antibody, Alexa Fluor 647         | 1:300                | ThermoFisher                                     | A21244                  |
| Donkey anti-Mouse IgG (H+L) Highly Cross-Adsorbed Secondary Antibody, Alexa Fluor 647 | 1:300                | ThermoFisher                                     | A31571                  |
| Phospho-Src Family (Tyr416)                                                           | 1:500                | ThermoFisher                                     | 2101                    |
| Phospho-Src42A (Tyr400)                                                               | 1:500                | Shigeo Hayashi lab (Shindo, M., et al. 2008)     | N/A                     |
| FasIII                                                                                | 1:100                | Developmental Studies Hybridoma Bank             | 7G10                    |
| Src42A                                                                                | 1:200                | Tetsuya Kojima lab (Takahashi, M., et. al. 2005) | N/A                     |
| Schneider's Drosophila medium(1x)                                                     | N/A                  | gibco                                            | 21720-024               |
| Fetal bovine serum defined insulin                                                    | N/A                  | Hyclone                                          | SH30070.03              |
| Penicillin-Streptomycin (10,000 U/mL)                                                 | N/A                  | sigma                                            | I5500                   |
| Phalloidin-TRITC                                                                      | N/A                  | gibco                                            | 15140                   |
| Alexa Fluor 647 Phalloidin                                                            | N/A                  | Sigma                                            | P1951                   |
| DAPI                                                                                  | N/A                  | ThermoFisher                                     | A22287                  |
| Bovine Serum Albumin                                                                  | N/A                  | Sigma                                            | D9542                   |
|                                                                                       |                      |                                                  | A3912                   |

## Supplementary Methods

Complete sequence of the five tandem copies of the Socs36E enhancer fragment for creating *10XSTAT-GAL4* is below:

```
GCGGCCGCGAACCCTCAGAGTGCCTGCGTGTGTGTGTGTGTGTGTGCGTGTGAGTCCG
CTTGTGTATCTGTGAGAGTGAGTGCGAGTACGAGTATCTTTGTATCTGCTGGTTTCGCCT
GGGCTGTCTGTCACTTCTCAGAAATCGGTCTAAATTAGAAAATGCGTTTCTGGGAATTT
CGTATCGCTCTTTTGGGCCACGGAGCTCAGCGAACAACATATATAAAAAAATATACAT
ATATATGTATATTGTCAGTATATATTGTAGCCATTCCCCTTACGTCCAGTTCGCGGAATA
TTGCGCCTTTCCCTAATAAATTTATCAATGGCATTGCAAATATTATATAGCAAACAGGG
CAACTATTTATTTTGTCTTAGTAATTTATGCAAACAGCGAGCGGTTTCCAGGGAATTCCAATT
ACCACAATGTGGTAAACACCTAAGACAGTTTTGTATACCGGTGAACCACTCAGAGTGCC
TGCGTGTGTGTGTGTGTGTGCGTGTGAGTCCGCTTGTGTATCTGTGAGAGTGAGTGCG
AGTACGAGTATCTTTGTATCTGCTGGTTTCGCCTGGGCTGTCTGTCACTTCTCAGAAATC
GGTCTAAATTAGAAAATGCGTTTCTGGGAATTTTCGTATCGCTCTTTTGGGCCACGGAG
CTCAGCGAACAACATATATAAAAAAATATACATATATATGTATATTGTCAGTATATATTGT
AGCCATTCCCCTTACGTCCAGTTCGCGGAATATTGCGCCTTTCCCTAATAAATTTATCAA
TGGCATTTGCAAATATTATATAGCAAACAGGGCAACTATTTATTTTGTCTTAGTAATTTATG
CAAACAGCGAGCGGTTTCCAGGGAATTCCAATTACCACAATGTGGTAAACACCTAAGACA
GTTTTGTATAAGCTTGAACCACTCAGAGTGCCTGCGTGTGTGTGTGTGTGTGCGTGTGA
GTCCGCTTGTGTATCTGTGAGAGTGAGTGCGAGTACGAGTATCTTTGTATCTGCTGGTT
CGCCTGGGCTGTCTGTCACTTCTCAGAAATCGGTCTAAATTAGAAAATGCGTTTCTGGG
AATTCGTATCGCTCTTTTGGGCCACGGAGCTCAGCGAACAACATATATAAAAAAATAT
ACATATATATGTATATTGTCAGTATATATTGTAGCCATTCCCCTTACGTCCAGTTCGCGG
AATATTGCGCCTTTCCCTAATAAATTTATCAATGGCATTGCAAATATTATATAGCAAACA
GGGCAACTATTTATTTTGTCTTAGTAATTTATGCAAACAGCGAGCGGTTTCCAGGGAATTCC
AATTACCACAATGTGGTAAACACCTAAGACAGTTTTGTATAAGCTTGAACCACTCAGAGT
GCCTGCGTGTGTGTGTGTGTGCGTGTGAGTCCGCTTGTGTATCTGTGAGAGTGAGT
GCGAGTACGAGTATCTTTGTATCTGCTGGTTTCGCCTGGGCTGTCTGTCACTTCTCAGAA
ATCGGTCTAAATTAGAAAATGCGTTTCTGGGAATTTTCGTATCGCTCTTTTGGGCCACG
GAGCTCAGCGAACAACATATATAAAAAAATATACATATATATGTATATTGTCAGTATATAT
TGTAGCCATTCCCCTTACGTCCAGTTCGCGGAATATTGCGCCTTTCCCTAATAAATTTAT
CAATGGCATTGCAAATATTATATAGCAAACAGGGCAACTATTTATTTTGTCTTAGTAATTT
ATGCAAACAGCGAGCGGTTTCCAGGGAATTCCAATTACCACAATGTGGTAAACACCTAAGA
CAGTTTTGTATGCATGCGAACCACTCAGAGTGCCTGCGTGTGTGTGTGTGTGTGCGTG
TGAGTCCGCTTGTGTATCTGTGAGAGTGAGTGCGAGTACGAGTATCTTTGTATCTGCTG
GTTTCGCCTGGGCTGTCTGTCACTTCTCAGAAATCGGTCTAAATTAGAAAATGCGTTTCT
GGGAATTTTCGTATCGCTCTTTTGGGCCACGGAGCTCAGCGAACAACATATATAAAAAA
ATATACATATATATGTATATTGTCAGTATATATTGTAGCCATTCCCCTTACGTCCAGTTCG
CGGAATATTGCGCCTTTCCCTAATAAATTTATCAATGGCATTGCAAATATTATATAGCA
AACAGGGCAACTATTTATTTTGTCTTAGTAATTTATGCAAACAGCGAGCGGTTTCCAGGGA
TTCCAATTACCACAATGTGGTAAACACCTAAGACAGTTTTGTATGCGGCCGC
```
